# Supplementary material
Source: PubMed Central journal article supplement (PMC3246104)
Supplement: NIHMS323464-supplement-06.pdf [file NIHMS323464-supplement-06.pdf]

## **Supplementary Video Captions**

**Supplementary Video 1.** Transport of uncoated polystyrene particles (PS-COOH; ~220 nm in diameter) in fresh human cervicovaginal mucus over the course of 20 s movies (15 fps, shown at 2x speed).

**Supplementary Video 2.** Transport of PLGA particles coated with PVA (PLGA/PVA; ~140 nm in diameter) in fresh human cervicovaginal mucus over the course of 20 s movies (15 fps, shown at 2x speed).

**Supplementary Video 3.** Transport of PLGA particles coated with Vitamin E TGPS (PLGA/VP1k; ~220 nm in diameter) in fresh human cervicovaginal mucus over the course of 20 s movies (15 fps, shown at 2x speed).

**Supplementary Video 4.** Transport of PLGA particles coated with Vitamin E-PEG5k (PLGA/VP5k; ~270 nm in diameter) in fresh human cervicovaginal mucus over the course of 20 s movies (15 fps, shown at 2x speed).

**Supplementary Video 5.** Transport of polystyrene particles densely coated with 2 kDa PEG (PS-PEG; ~230 nm in diameter) in fresh human cervicovaginal mucus over the course of 20 s movies (15 fps, shown at 2x speed).
